# Supplementary material for: Modulation of band gap by an applied electric field in silicene-based hetero-bilayers
Source: Royal Society of Chemistry journal article supplement (doi:10.1039/c4cp05462h), 2015-01-01
Supplement: c4cp05462h1.pdf [file c4cp05462h1.pdf]

## Modulation of band gap by applied electric field in Silicene-based hetero bilayers

Sandeep Nigam,<sup>1,2</sup> Sanjeev K. Gupta<sup>1,3</sup>, C. Majumder<sup>2</sup>, Ravindra Pandey<sup>1</sup>

<sup>1</sup>Department of Physics, Michigan Technological University, Houghton, Michigan, USA, 49931

<sup>2</sup>Chemistry Division, Bhabha Atomic Research Centre, Trombay, Mumbai, India, 400085

<sup>3</sup>Department of Physics and Electronics, St. Xavier's College, Ahmedabad, India 380009.

\*Corresponding Author

Sandeep Nigam: (snigam.jpr@gmail.com)

Ravindra Pandey (pandey@mtu.edu)

### Supporting Information

**Table-S1: Comparison of present theoretical method with previous work**

| <u>system</u>   | <u>Source</u>                                                                                                                         | <u>Lattice constant<br/>(method)</u> | <u>Band gap</u> | <u>Buckling</u> |
|-----------------|---------------------------------------------------------------------------------------------------------------------------------------|--------------------------------------|-----------------|-----------------|
| graphene        | Present work                                                                                                                          | 2.47 Å                               | ~0 eV           | 0               |
|                 | S. Tang, J. Yu and L. Liu<br><i>Phys. Chem. Chem. Phys.</i> , <b>2013</b> 15, 5067                                                    | 2.46 Å<br>(PBE+vdw; CASTEP)          | ~0 eV           | 0               |
|                 | Shaoqing Wang<br><i>Phys. Chem. Chem. Phys.</i> , <b>2011</b> , 13, 11929–11938                                                       | 2.44 Å<br>(LDA; ABINIT)              | ~0 eV           | 0               |
|                 | H. Sahin, S. Cahangirov, M. Topsakal, E. Bekaroglu, E. Akyurk, R. T. Senger and S. Ciraci,<br><i>Phys. Rev. B.</i> , 2009, 80, 155453 | 2.46 Å<br>(LDA; VASP)                | ~0 eV           | 0               |
| BN<br>monolayer | Present work                                                                                                                          | 2.51 Å                               | 4.45 eV         | 0               |
|                 | L. Li, X. Wang, X. Zhao, and M. Zhao,<br><i>Phys. Lett A</i> 2013 377 2628.                                                           | 2.51 Å<br>(PBE+vdW ; VASP)           | -               | 0               |
|                 | M. Topsakal, E. Aktürk, and S. Ciraci<br><i>Phys. Rev. B</i> 2009 79 115442.                                                          | 2.51 Å<br>(PW91-VASP)                | 4.47 eV         | 0               |
|                 | H. Sahin, S. Cahangirov, M. Topsakal, E. Bekaroglu, E. Akyurk, R. T. Senger and S. Ciraci,<br><i>Phys. Rev. B.</i> , 2009, 80, 155453 | 2.46 Å<br>(LDA; VASP)                | 4.61eV          | 0               |
| Silicene        | Present work                                                                                                                          | 3.85 Å                               | ~0 eV           | 0.47 Å          |
|                 | Shaoqing Wang<br><i>Phys. Chem. Chem. Phys.</i> , <b>2011</b> , 13, 11929–11938                                                       | 3.82 Å<br>(LDA; ABINIT)              | ~0 eV           | 0.43 Å          |
|                 | H. Sahin, S. Cahangirov, M. Topsakal, E. Bekaroglu, E. Akyurk, R. T. Senger and S. Ciraci,<br><i>Phys. Rev. B.</i> , 2009, 80, 155453 | 3.83 Å<br>(LDA; VASP)                | ~0 eV           | 0.44 Å          |
|                 | N. D. Drummond, V. Zolyomi, and V. I. Fal'ko<br><i>Phys. Rev. B</i> 2012 85, 075423                                                   | 3.86 Å<br>(PBE; CASTEP)              | ~0 eV           | 0.45 Å          |

Table-S2: Interaction, strain and binding energies of the bilayer systems  
(All energies are in unit of **meV/atom**)

|                                   | Interaction energy <sup>1</sup> | Strain energy <sup>2</sup> | Binding energy <sup>3#</sup> |
|-----------------------------------|---------------------------------|----------------------------|------------------------------|
| Silicene/graphene                 | -24.6                           | 13.3                       | -12.7                        |
| Silicene/BN                       | -27.06                          | 4.1                        | -24.4                        |
| Graphene/BN<br>(AB-stacked)       | -30.16                          | 5.4                        | -25.8                        |
| Graphene/graphene<br>(AB-stacked) | -24.2                           | $\approx 0.0$              | -24.9                        |

1. Interaction energy =  $E_{AB}(R_{\text{optimized}}) - E_{AB}(R_{\text{interlayer}} = 8 \text{ \AA})$
2. Strain energy =  $(E_A + E_B)$  obtained at the bilayer equilibrium configuration  
–  $(E_A + E_B)$  obtained at the monolayer equilibrium configuration
3. Binding energy (binding energy with respect to the constituent monolayers)  $E_{\text{binding}} = E_{AB} - E_A - E_B$ .

#Theoretical binding energy (Interaction energy + Strain energy) has approximately 6.5% difference with the calculated binding energy. This is due to the long range interaction assessed by vdW correction term (D2) within PBE functional, during estimation of interaction energy, in particular  $E_{AB}(R_{\text{interlayer}} = 8 \text{ \AA})$  term. While calculating the binding energy, the two layers have been assumed to be infinitely separated having no interaction at all.

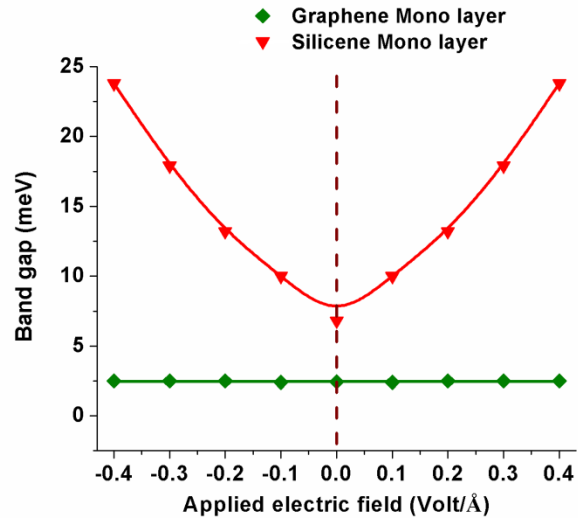

Figure S1: The variation of the band gap with the external perpendicular electric field.

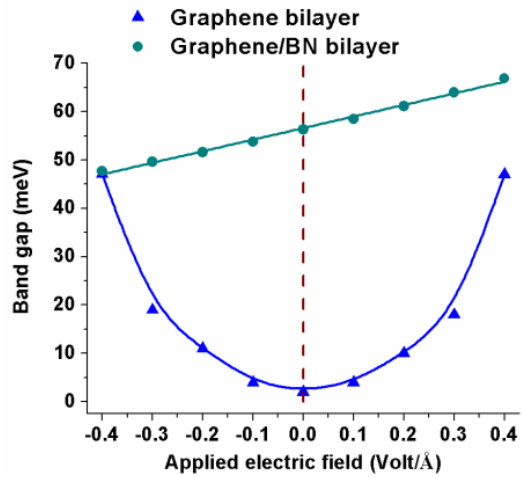

Figure S2: The variation of the band gap with the external perpendicular electric field.

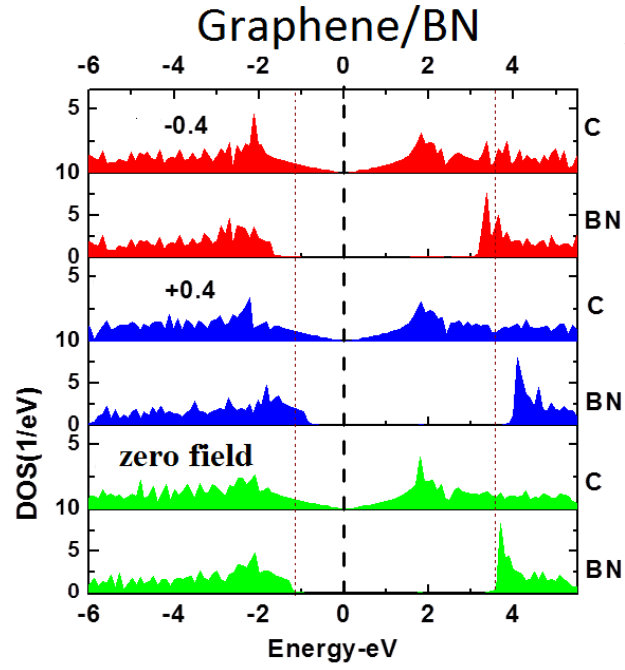

Figure S3: The  $p_z$  orbital projected density of states for graphene/BN for  $E_{\text{Field}} = 0, +0.4 \text{ V/\AA}$ , and  $-0.4 \text{ V/\AA}$ . Zero of the energy is aligned to the Fermi level. The dotted line corresponds to the top of the valence and bottom of the conduction band of the BN monolayer layer at  $E_{\text{Field}} = 0$ .

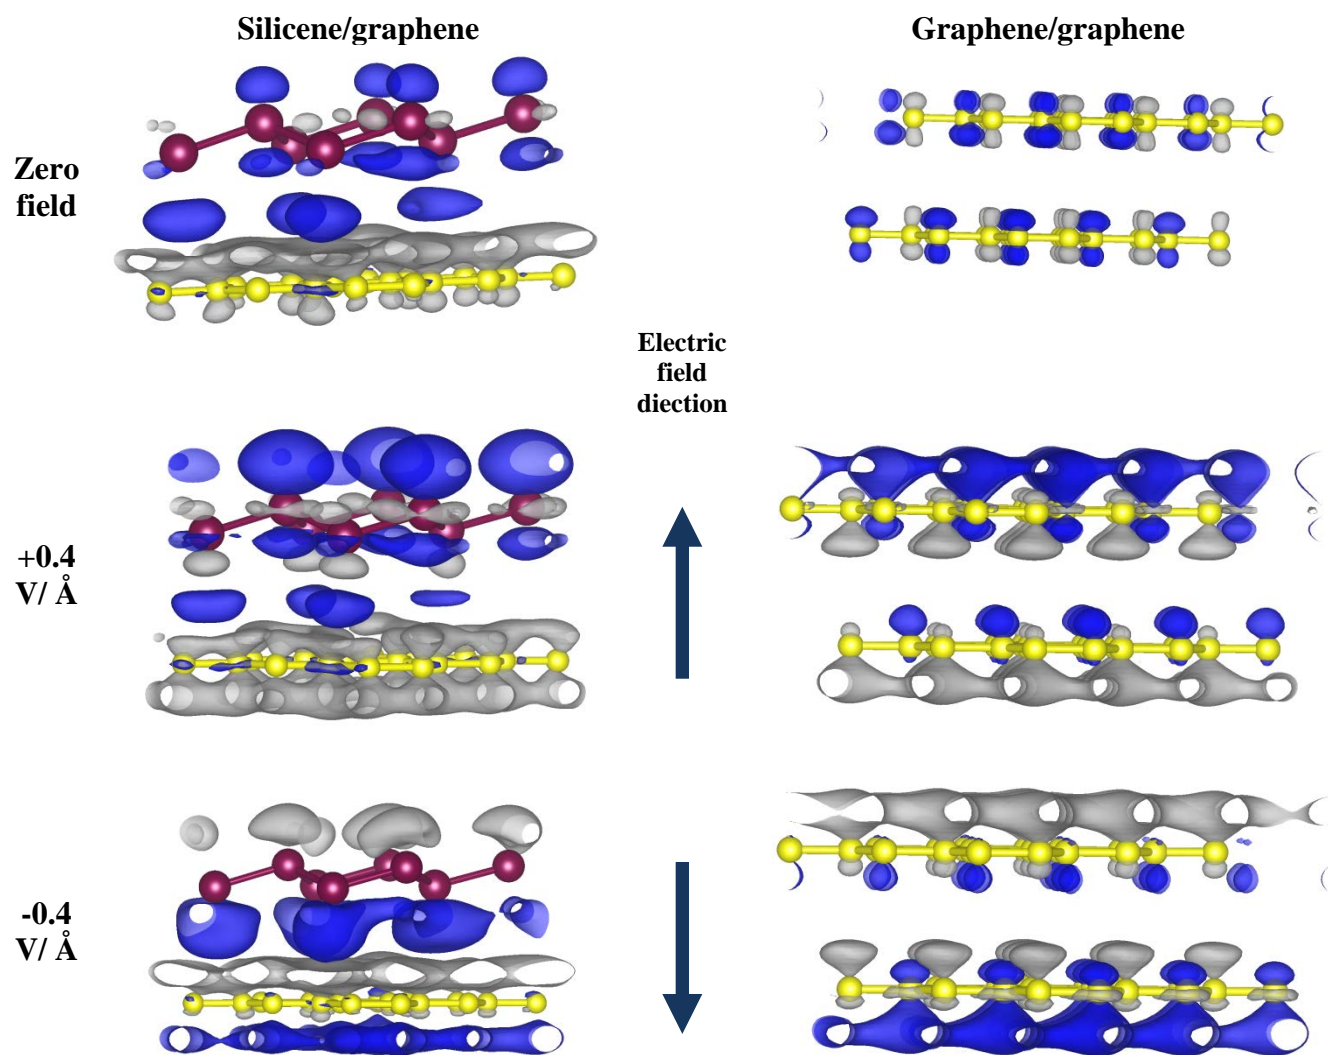

Figure S4: Charge density difference ( $\Delta\rho$ ) for silicene/graphene and graphene/graphene bilayer system in zero applied field and  $+0.4 \text{ V/\AA}$  and  $-0.4 \text{ V/\AA}$  external applied field. The blue lobe indicates increase of charge and gray lobes represented reduction of charge from those sites. Positive value of electric field defines the field from bottom to top. The charge contour value is  $6e^{-3} \text{ electron/bohr}^3$ .

# Silicene on h-BN surface

Top  
view

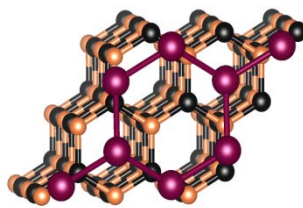

Zero  
field

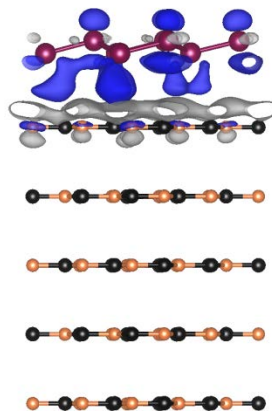

+0.4  
V/Å

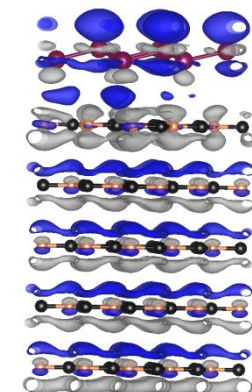

-0.4 V/  
Å

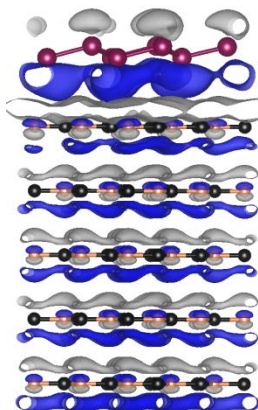

Figure S5: Structure and charge density difference ( $\Delta\rho$ ) for silicene/BN (*Si*: purple, *B*: black, *N*: Orange)
